# Supplementary material for: A qPCR assay for Bordetella pertussis cells that enumerates both live and dead bacteria
Source: PLoS One. 2020 Apr 30;15(4):e0232334. doi: 10.1371/journal.pone.0232334 (PMC7192480; doi:10.1371/journal.pone.0232334)
Supplement: S5 Table — (XLSX) [file pone.0232334.s005.xlsx]

## Sheet: S5 Table. Effect of eukaryotic 
S5 Table. Effect of eukaryotic gDNA on the detection of B. pertussis.
Eukaryotic THP-1 genomes	Perecentage of viable B. pertussis detected
0	97	103	100	111	89	99.3511	111.68
29	105.24	85.74	105.95	100.94	107.43	88.62
141	111.042	90.4698	100.11	69.95	104.03	113.8	109.15
275	99	94	91.51	97.18	96.57	99.97	105.07
366	101	86.19	110.81	112.58	110	104	80
507	105.636	90
671	99	110.65	85	97	92	108.8	107.37
746	95.45	85.83	101.51	109.75
875	91	107	94	107.22
1023	96.5571	102.537	105	73	105.31	108.18
1251	103.04	100.19	92	80	110	102.56	102.72
1503	88.03	91.57	119.57	107.72	97.12	95.43	91.15
1868	101.72	97.3	109	84	84
2316	101.43	91.32	92.35	96.27
2804	115.66	116.65	87.04	114.09	75.6	70.55	85.95
3446	98	82	76	80
5385	72	82	104	68	67
8414	83	58	64	72	56	48
10843	59.6325	37.0372	67	65	41
20000	39.6035	28.7371
