# Supplementary material for: A qPCR assay for Bordetella pertussis cells that enumerates both live and dead bacteria
Source: PLoS One. 2020 Apr 30;15(4):e0232334. doi: 10.1371/journal.pone.0232334 (PMC7192480; doi:10.1371/journal.pone.0232334)
Supplement: S10 Table — (XLSX) [file pone.0232334.s010.xlsx]

## Sheet: S10 Table. Enumeration of six s
S10 Table. Enumeration of six strains of B. pertussis with both culture and PMA-qPCR produced comparable values.
	Culture										qPCR
BP1917	207000000	256000000	369000000	375000000	210000000	400000000	530000000	500000000	600000000	400000000	2690000000	2690000000	2770000000
BP536	525000000	596000000	433000000	540000000	850000000	430000000	800000000	1100000000	1100000000	500000000	2140000000	2.57411e+09	2.44741e+09
UK48	347000000	410000000	350000000	390000000	690000000	500000000	800000000	800000000			336000000	374000000	309000000	327000000	303000000	317000000	331000000
UK71	256000000	530000000	260000000	540000000	1490000000	400000000	800000000	800000000			375000000	409000000	408000000	336000000	340000000	431000000	451000000
B184	358000000	467000000	195000000	540000000	370000000	900000000	1000000000	900000000			466000000	463000000	481000000	494000000	491000000	488000000	559000000	576000000	579000000
B204	266000000	400000000	330000000	540000000	750000000	340000000	700000000	800000000			461000000	497000000	490000000	516000000	520000000	550000000	568000000	595000000
